# Supplementary material for: Identification of Haplotypes Associated With Resistance to Bacterial Cold Water Disease in Rainbow Trout Using Whole-Genome Resequencing
Source: Front Genet. 2022 Jun 23;13:936806. doi: 10.3389/fgene.2022.936806 (PMC9260151; doi:10.3389/fgene.2022.936806)
Supplement: Supplementary file 1 [file Table1.XLSX]

## Sheet: Table S1
Generation	Fish age (days post-hatch)	Mean body weight (g)	Fp OD525	Vol (uL)	CFU per fish	CFU per gram body weight	Mortality (%)	IACUC protocol
2015	84	3.4	NA	100	7100000	2.08824e+06	0.343	53
2017	80	1.8	0.27	100	1700000	944444	0.392	133
2019	98	2.37	0.239	100	18000000	7.59494e+06	0.411	154
2021	86	1.8	0.3	100	2.08667e+07	1.15926e+07	0.55	186

## Sheet: Table S2
Year-class	Sample	Group	Pool	Omy8-hap1	Omy8-hap2	Omy25-hap1	Omy25-hap2
2013	13TLUM_01587	R	1	1	1	1	1		1 stands for favorable haplotypes associated with BCWD resistance
2013	13TLUM_01667	R	1	1	1	ATT	1
2013	13TLUM_03061	R	1	1	1	AGG	1
2013	13TLUM_03195	R	1	1	1	ATT	1
2013	13TLUM_01617	R	1	1	1	AGG	1
2013	13TLUM_01733	R	1	1	1	1	AGG
2013	13TLUM_01671	R	1	1	1	1	AGG
2013	13TLUM_01665	R	1	1	1	1	AGG
2013	13TLUM_01589	R	1	1	1	1	AGG
2013	13TLUM_01995	R	1	1	1	1	ATT
2013	13TLUM_01439	S	2	ACG	ATA	AGG	AGG
2013	13TLUM_02427	S	2	ATA	GTG	AGG	AGG
2013	13TLUM_03096	S	2	ATA	ATG	AGG	ATT
2013	13TLUM_03385	S	2	ATG	ATA	AGG	AGT
2013	13TLUM_02046	S	2	ACA	ATA	AGG	ATT
2013	13TLUM_00001	S	2	ATA	ATA	AGG	AGG
2013	13TLUM_00261	S	2	ATG	ATA	ATT	AGG
2013	13TLUM_01585	S	2	ATG	ACG	1	AGG
2013	13TLUM_02654	S	2	ATA	ATA	ATT	1
2013	13TLUM_01812	S	2	ATA	ACG	1	ATT
2015	15TLUM_00590	R	3	1	1	1	1
2015	15TLUM_03748	R	3	1	1	1	1
2015	15TLUM_00482	R	3	AGA	1	1	1
2015	15TLUM_01135	R	3	GAG	1	1	1
2015	15TLUM_03821	R	3	1	AAA	1	1
2015	15TLUM_00295	R	3	AGG	1	1	1
2015	15TLUM_03009	R	3	AAA	AGG	1	1
2015	15TLUM_02970	R	3	AGA	AAA	1	1
2015	15TLUM_00115	R	3	1	AAA	1	1
2015	15TLUM_01593	R	3	1	AGG	1	1
2015	15TLUM_02182	S	4	GAA	AAA	ACA	ACC
2015	15TLUM_02972	S	4	AGA	AAA	AAC	ACC
2015	15TLUM_01404	S	4	AAA	GAG	ACC	AAA
2015	15TLUM_00888	S	4	AAA	AGA	AAC	AAA
2015	15TLUM_03941	S	4	AGG	AAA	AAC	AAA
2015	15TLUM_00704	S	4	GAG	AAG	ACC	ACC
2015	15TLUM_03560	S	4	AAA	1	ACC	AAA
2015	15TLUM_02887	S	4	AAA	1	AAA	AAA
2015	15TLUM_02331	S	4	1	AAA	ACC	ACA
2015	15TLUM_02528	S	4	1	AGA	AAC	AAA

## Sheet: Table S3
CHR	Assay	BP	ASSAY_ID	ASP1_NAME	ASP2_NAME	ASP1_SEQ	ASP2_SEQ	LSP_SEQ	STA_SEQ	Comment
3	P176	55254152	GTA0162610	T	G	GCAGGTGATGACTCCAATATGTGTA	GCAGGTGATGACTCCAATATGTGTC	CCATTTTCCCGGTTGTCCCA	CGCGTGGACATTTTGCAGAT
3	P161	55611964	GTA0162626	G	T	GAGATAACCCCTGGATTATTAGCTGG	GAGATAACCCCTGGATTATTAGCTGT	CTGGTCAGTGAGACTCGGACA	TGCAGATAGCCATACTGCAGA
3	P178	57059195	GTA0162589	A	G	CTGCAGAAAGCTCCTATATGGAAGTAT	TGCAGAAAGCTCCTATATGGAAGTAC	ACTATGGCTATGGTAGGTAATAGGTCAACT	TGTATAACTAACAAACTGCAGAAAGC
3	P316	57242648	GTA0211776	T	C	GCGGAGAGAGTCAAAAAGAGAACA	CGGAGAGAGTCAAAAAGAGAACG	GCCATGGTTGCCCTTAGTTTGA	GGCATTTGACTGCAAATATGCG
8	P318	75054110	GTA0246631	T	G	AAAGCGTTGAGATCCTGCCT	AGCGTTGAGATCCTGCCG	CAGGTGGCAGCCAAACCTAA	TCCATAGACCGAGTGGTAGAAAG
8	P319	75056552	GTA0246636	G	C	ACTACTGACTTTACACTGTCATCATGTG	ACTACTGACTTTACACTGTCATCATGTC	GCCTCAAGGTTTGGATCTGAGC	ACGTCTGATGTAAGCTGAACAAC
8	P323	75064254	GTA0246644	T	A	GTAGAAATGAATGTGACGTCTTTTGAAGA	GTAGAAATGAATGTGACGTCTTTTGAAGT	AGCTGACTGATGCTGGATCAGAA	CACAGAATGAAATGACGACAGAAGA
8	P489	76457672	GTA0266143	C	A	AGACTCTGGTTAAAAGTAGTGCACTATC	AAAGACTCTGGTTAAAAGTAGTGCACTATA	GGGCCTGCATCTCAAGTGG	GCCCATAGTGTTCTGGTCAAA
8	P490	76656366	GTA0266148	C	T	TGTCTGTCCATCTGTCTCTACTATATACATAC	TGTCTGTCCATCTGTCTCTACTATATACATAT	CCCCCTTCAGGATAGGACCA	CTGTCTGTCTGTCTGTCTACTATACT
8	P329	76691975	GTA0246635	T	A	GGGTTTCATTTTTTCTCACAGAGTCAT	GGGTTTCATTTTTTCTCACAGAGTCAA	GCAACACTCACAGCAAGCCT	AGATGACTGGAATGAAACATGCG
8	P330	76692073	GTA0246663	T	A	CAATATCTCAGCGTATCTCACTGGT	CAATATCTCAGCGTATCTCACTGGA	TCCACAGCGTTGGACAAACTA	CCCCCTCTTTAGAAAAGCCC
8	P332	76696519	GTA0246668	C	A	GTTTCTACTATGTAATGACATTTAAATCAGTGTGG	GTTTCTACTATGTAATGACATTTAAATCAGTGTGT	CTTGTAATGTAGGTACTGTAGCTACTGCT	GGCTGTTTAATATACCACTCCATGTTT
8	P194	76747151	GTA0162621	A	G	TGCCTGATGTCTAAACTGGACA	TGCCTGATGTCTAAACTGGACG	CTGGACTAGTGTCATGCACCCA	CGCATAAGGCTTGGACTGTT
8	P338	76749673	GTA0246662	G	C	AACCCGTTATTGTTTGTTTATTAACCTTAGATAG	AACCCGTTATTGTTTGTTTATTAACCTTAGATAC	ACATCAATCAATAGAGCTAAACATAGTGTA	ACGAATAGAAACCCGTTATTGTTTGT	removed from association analysis
8	P341	76758777	GTA0246657	A	G	CTTATAAAATGTTTTTACCTGAATGATGGAGGA	AAATGTTTTTACCTGAATGATGGAGGG	CATTTGTCAAAGTATGGCGACTGTGT	GTCTAATCAATATAATCTATGTCACTATACAGATGTC
8	P342	76765345	GTA0246655	A	T	GTTTCCATAGCCGAGGACCA	GTTTCCATAGCCGAGGACCT	AAGTACTTTTGTGTGTCAAGGAAAATGTTGA	GGGACCTTGATGAAATGGGT
8	P345	76808048	GTA0246664	T	A	CCTTGTGTTTCCCCATCGCTA	CTTGTGTTTCCCCATCGCTT	TGCTTTTACCTGCTTGATGGAGGA	ATTTATCAAAGTATGGCGACCTTG	removed from association analysis
8	P346	76815705	GTA0246637	G	T	TGCCTCGGATTGGGAACC	CTGCCTCGGATTGGGAACA	TGTTTTTCATTCTATGTTTTGTTCTGTGTGTTGT	ACGATCGACAGCTGCCT
8	P347	76844443	GTA0246641	G	A	TGGCTGAGTTGCACCCG	TGGCTGAGTTGCACCCA	CCCACCGTACTTTCTCCACCA	TTAGGACCTTGAGTGTGGCT
8	P350	76853682	GTA0246630	T	G	GGCAACTGCTAATCCTCCGAA	GGCAACTGCTAATCCTCCGAC	GATGTACTGGGCCATACGCTCTA	ACTGGTACGCCTGGTACG
8	P351	76856885	GTA0246665	A	T	CCCCTGCTCATATGCGTGAA	CCCCTGCTCATATGCGTGAT	CCCTGGCCACAACTGCAG	GAAAGATGCCCAGGGCC	removed from association analysis
8	P354	76874914	GTA0246639	T	C	GATACATGATGATGCTCCTGCAAA	GATACATGATGATGCTCCTGCAAG	CTATCCAAACTTGTCAGGTCAGTTA	ACTTACCCCACTGTAGATTCTGG
8	P355	76875468	GTA0246634	A	G	CCCCATGAAAGGAATCTGTTACTAGA	CCCCATGAAAGGAATCTGTTACTAGG	AGGGTACTACCAGCATCCACAATG	TCGTCACGTAGCCCAGC
8	P356	76879188	GTA0246654	G	A	CCATTTTTACGCTGCTACGACTC	CCATTTTTACGCTGCTACGACTT	GGTAATTGAGGTAATATGTACATGTACGTAGAGG	TCATTGACCCCACCCCC
8	P357	76879806	GTA0246658	C	A	GAAAACAGGCAGTGATACATACAGG	AGAAAACAGGCAGTGATACATACAGT	CACAACAAAATGTTGAATAAGTCCAAGGG	CACTCAGAAAACAGGCAGTGA
8	P358	76880925	GTA0246645	T	C	GTGCATTGCTTTTGTCCTCCTT	GTGCATTGCTTTTGTCCTCCTC	CGTGCACCGTACTCATGCC	CTGCAACTTTTGAATTACATTGTCAGT	removed from association analysis
8	P193	77402517	GTA0162603	C	T	GGTGCATCCTCTCAGAGCC	GGTGCATCCTCTCAGAGCT	GCCTGAAAATGGTGGACTCTGT	CCATGCTGCCGTTGAGAA	removed from association analysis
8	P191	78064599	GTA0162605	G	A	ACACTGAATTGGAAGTGTCCAGTC	ACACTGAATTGGAAGTGTCCAGTT	TGTGCTTCTTGACATGGTCGACA	AGGGAAGAACAACAGTTTTGTTGTTA
13	P494	42160393	GTA0266144	A	C	GCAGAACAGAGCCAATACCAATCA	CAGAACAGAGCCAATACCAATCC	CCCGACAGCTAATTGTTTGGTTTAAGT	TGGAGTGTGACCTGCCAG
25	P381	17246875	GTA0262389	A	C	GCTTTGTTGTATTTTTCCAAAGCAGAA	GCTTTGTTGTATTTTTCCAAAGCAGAC	ACTTGCTGTTCATCTGAGACGTGA	ACCATACCTATTTGTATTGCTTTGTTGT
25	P382	17272388	GTA0262387	G	A	ACTTGGATGTCCCCCTGC	CACTTGGATGTCCCCCTGT	CCAGGATGGCTCCACCACA	TGGTCTACCTCTAACCAACCC
25	P383	17893051	GTA0262342	C	T	CATGTTTTTCCCCTCCAGCC	CATGTTTTTCCCCTCCAGCT	CCTCTCTCCTGATTGGGTCCT	CAGGCCATGGTTTTAAATGACAAT
25	P384	17944754	GTA0262335	A	T	GATATCCAGGGCTCCAAGGA	GATATCCAGGGCTCCAAGGT	GCCTCTTTGGTACGCAGCTT	CCCGCAACACGGATGAG
25	P386	18159829	GTA0262343	G	A	CTGGAGTGGACATCTTCTTCTCG	CTGGAGTGGACATCTTCTTCTCA	CAGGCTGCCACAAAGAAACAGA	CTCACCTTACACAAAACCTCGAC
25	P230	18192885	GTA0162572	T	G	ATGTTCTGCTTTCATTTGCTCAATACT	TGTTCTGCTTTCATTTGCTCAATACG	TGTACTGTGTTTGTTTTGTTGCAGAGATTT	ACTGCAGTTTTATGTTCTTGTGTACA
25	P391	19063776	GTA0262413	G	A	GCGTGTGTGGGTGCAATAATTG	GCGTGTGTGGGTGCAATAATTA	CGTGCGCGAGATTCGCAAAA	CAGACGCTCGTTGGTGC
25	P392	19131282	GTA0262330	G	A	GCAAGAAGCATGCTTCCAAATTG	GAGCAAGAAGCATGCTTCCAAATTA	AAGGTTCACTTTAGAGTGGCCCA	ACTAGGTCCTAGGATTGTTGAGC
25	P393	19285578	GTA0262366	C	T	ACACTGTTTTCAGTGGACGGG	ACACTGTTTTCAGTGGACGGA	GAAGAACTTAGGGAGAACTATTGTTTCTCCA	CAGGAAGGAGGTGCAAACA
25	P395	19356106	GTA0262377	T	A	GCTAGATTGTCTCAAGGATGAACGTTA	GCTAGATTGTCTCAAGGATGAACGTTT	CGCAATACAGACAGCTCCTGGT	CGGTCGAGCCCAAGCTA
25	P398	19480661	GTA0262349	G	A	CAAGCACTGAACATGTTAGGCAC	CAAGCACTGAACATGTTAGGCAT	TGGCTGGATGATTGTGTGTCCT	CAAGAGAGTGGATTGACAGTTACA
25	P399	19525929	GTA0262409	G	T	ACGGAGACGGCTGTTCG	GTTAACGGAGACGGCTGTTCT	CGTGGCTGAACAAGGACATGAAT	ACCACCCCCTCTGATGTT
25	P214	19553268	GTA0162579	A	C	CCGTGTCATTTTGACAAGCCTT	CCGTGTCATTTTGACAAGCCTG	GTAGAGATCGAGGCACAGGTACA	GAACGTCGGGAGTCATTAAGAC
25	P402	19652654	GTA0262412	A	T	TGTTTCAGACATAATTATGCACTATAGCACTA	GTTTCAGACATAATTATGCACTATAGCACTT	AGACAGCAGGCTCAATCAACCAT	ACACAATTATGAGTGATGAGAGGGT
25	P404	19682358	GTA0262328	G	A	GTGTCAGGGTAGGATTCCCTTC	GTGTCAGGGTAGGATTCCCTTT	CCCGGCAGCAGGCTCTAAT	CTGTGTAATGTTACATGCTGGGT
25	P409	19886570	GTA0262360	T	C	CGATTTGTCAACTACCGCATATAGGT	GATTTGTCAACTACCGCATATAGGC	GCATCATAATGAATTTCTGCTATGCCACA	TCACGATTTGTCAACTACCGC
25	P411	20025084	GTA0262403	C	T	AATATTATTAAAGTGGCTAGTGTTCCATTATTAAAG	AATATTATTAAAGTGGCTAGTGTTCCATTATTAAAA	GCACCTTAGAGGCTGCTGTTC	ACACTATATACATATGAGATGAGTAAAGCAGT	removed from association analysis
25	P412	20059482	GTA0262334	A	C	AGGTTCACTCTGTCATCTGCATT	AGGTTCACTCTGTCATCTGCATG	GTGTCAATTTGTTTGTCTGCATGCC	GCCTGCAGGTTTATCATGATTACTT
25	P413	20082809	GTA0262359	C	T	GTTTCGCTTAGGGCAGCAC	GTTTCGCTTAGGGCAGCAT	GCCCGGTCCTTGCCGA	CCTATACTACTATTCTACTTTGCGGG
25	P415	20153489	GTA0262341	T	C	GATCCCAGGTAGTACTCTATGAGGAT	TCCCAGGTAGTACTCTATGAGGAC	GGACCATGCCTGTGACGTG	CCCCACCTGGAAGAGAGT
25	P417	20228457	GTA0262407	T	C	ACCAATGTGATAATGGCTGGGATT	CCAATGTGATAATGGCTGGGATC	GCTATGAAGAGAACAGCAACAGCAA	CTGAGCTGAAAGAAGCTACATCAA
25	P420	20306455	GTA0262322	A	G	CAGCTAGCTAGCACTGCAGTA	AGCTAGCTAGCACTGCAGTG	CCCTCTCTTTGAGTGAACTACTGACA	AATGAATCTACTACTGAAAACATAAGCTAC
25	P495	20307827	GTA0266147	C	A	AGAGAAAGACAGAGCGGTTTACC	GAGAGAAAGACAGAGCGGTTTACA	GCTTTGAATAATGAATTCAAATGAATTGATCGATATACTT	CCCCTGAACGGGAAGGA
25	P424	20403696	GTA0262370	T	C	GGTGAATTTGTATTTGATGTTGAATAGCCTATTAAT	GTGAATTTGTATTTGATGTTGAATAGCCTATTAAC	GGTAATGTGTCACTCAATTAATTATGAAACAATTACCT	GCCAGGTGGCTTACAGTTAG
25	P425	20437940	GTA0262373	T	C	GGATATACTAAAATTACGGTATACTAAAATGAACTA	GGATATACTAAAATTACGGTATACTAAAATGAACTG	ACTACATACTTAATTAGTATATAACACATACTATATGCT	GAGCTAGTACCCTCAACCAAAAG
25	P426	20465120	GTA0262331	A	G	GCATCACTTGGAGACTTAACTTTACGT	CATCACTTGGAGACTTAACTTTACGC	GATTGTGTTAGAACAGTTCAAAAATTATGTGTCTGA	GTACTCATCTGCAAGGATTGCT
25	P429	20570095	GTA0262378	C	T	GTTTTCTACTGTTTTTGCATCCCTTTTC	GTTTTCTACTGTTTTTGCATCCCTTTTT	GGACTGTACATAACAGCAGGACTGTAA	CAGCCTTCTCTTACCTATCTGTCT
25	P430	20591515	GTA0262327	G	T	ACACCATAGCACAGGCTCTAC	CACACCATAGCACAGGCTCTAA	CAGGGATTTAGGGATTTGATGCATCT	TGCCCTTTTATTACTGACAACATCA
25	P431	20647628	GTA0262323	G	A	CTAAAGTGGAAAGTCTGAAGAAGACAAC	ACTAAAGTGGAAAGTCTGAAGAAGACAAT	AGTCACCCCTCTGTGGCATT	TGCTCACTAATGAAGTGGATACCT
25	P433	20722720	GTA0262385	A	G	CCCTTTTTTTATTCCAGGCTTTATCTAATTATTT	CCCTTTTTTTATTCCAGGCTTTATCTAATTATTC	AACTGAAATGTATTTTGTCCATTGTGTATTTCCA	GAAATGTGGCCCTTTTTTTATTCCA
25	P212	20751780	GTA0162575	G	T	CTATGAAAGTATGCTGATAACATCTGCC	ACTATGAAAGTATGCTGATAACATCTGCA	GTGGCGCCACGTGCA	TGCTTTGATAACGCGTCTTCATG
25	P435	20770014	GTA0262336	G	T	CACATGATTTTTAAAACCCTGTCAAACTATTTG	CACATGATTTTTAAAACCCTGTCAAACTATTTT	TTGTCTATGTGTGGGTAGAAGAAATCCTC	ACCAGTTTTTCCCTAATCAGGC
25	P436	20797381	GTA0262405	C	A	TCTGATTGGACTCAAGGATGTCC	CTCTGATTGGACTCAAGGATGTCA	TCCTGCTCCCCAACTGAACA	TGAGTTGAAGATGAATCCCTGAGA
25	P437	20814089	GTA0262382	A	G	ACAAGCGCTCGTGGATATTTAGA	ACAAGCGCTCGTGGATATTTAGG	TCAGGCGGCGGTGAGTT	GCGTTCGCACCAAGGTAAA
25	P438	20905605	GTA0262383	C	T	CCTCCCACACTGGTTCTGTAC	CCTCCCACACTGGTTCTGTAT	ACGTGTGTCTCATGTGGCAGT	ACTTCCTCATGGTTCTATGCCT
25	P439	20918179	GTA0262386	T	C	AAAAACACTATATTTGCCGTGCCA	AAAACACTATATTTGCCGTGCCG	TGCCCACTAACTACAACACAGGT	AGCAATCATAACTAACAAAAATCCAGAGA
25	P440	20937844	GTA0262398	T	A	GACCTCATCAGCAGCTTGGA	ACCTCATCAGCAGCTTGGT	TTGGTTCATCCTCCTGGCTGT	GGCCTTGGGTCCACTCT
25	P443	21034905	GTA0262399	G	T	CAATATGTTGAAATTGGACGTCTTTGAAAAG	CAATATGTTGAAATTGGACGTCTTTGAAAAT	TCAGTGGCCTACTGAAAGCCA	TCAGATTAGAATAATGCTGACTTTGTCC
25	P444	21063361	GTA0262337	C	T	ACTGAGTAAGAGCAAACGTAGCC	GTACTGAGTAAGAGCAAACGTAGCT	GTATCATCATTGGTATTATCAGGCTGTATTAGCT	CCGCTAATGCTAATTGCTAGCT	removed from association analysis
25	P446	21118315	GTA0262418	C	A	ATTCTGATTCCCATAATCTTTTTAAAAAAGTAAATC	ATTCTGATTCCCATAATCTTTTTAAAAAAGTAAATA	AGTAAAAAGAGAGGGAGAAATATAAGGAGAGAAAATAATT	CCCATACATGTCAGAAATGCAATTC
25	P228	21146360	GTA0162580	G	T	GTTGTCAAAGGCCAAAGGTCG	GTTGTCAAAGGCCAAAGGTCT	GGTGACATCATTGCGGCGG	TGCAGACGGTTGTACAGGT
25	P447	21164811	GTA0262394	A	G	CCTCCCTCCTCACACAGAA	CCTCCCTCCTCACACAGAG	TTGACTAAGTTAGACATTTGGGTGGACA	ACGGCCACGAGTCTGG
25	P497	21245059	GTA0266145	C	T	CTTGTTGTCTGGGCATGCG	CTTGTTGTCTGGGCATGCA	TCACGTCACGGGCATCAGT	GACCACTGCTCCAGCG
25	P448	21245244	GTA0262365	C	T	GGAATTCTCCTGTCACTCGATTCAC	GGAATTCTCCTGTCACTCGATTCAT	TTCTTCTCTGTGAGTCTGGAGAGTA	CTCGCCTGCCGGTCC
25	P498	21260524	GTA0266142	G	T	TGCCATCCCTATGTACTTTGTGG	TGCCATCCCTATGTACTTTGTGT	TGTTTTTATAATGGAGCAATCTTCATTCTTATATGTTGTT	AGAGACCCTGCTGCCA
25	P499	21260707	GTA0266151	T	C	GTCAAGCCCTGGGTGTGAt	GTCAAGCCCTGGGTGTGAc	TGTGACTGAGTCTCCCACCA	CCTGCTGCCATCCCTATGTA
25	P451	21429395	GTA0262364	C	T	CCAGTGTTCCGTGGTTCTGG	CCAGTGTTCCGTGGTTCTGA	ACAGCAGTTCCCGTCCACT	CACCTGTAATGCTACTCAGAACTT
25	P360	21430497	GTA0246659	G	T	TCGGGTAAGGAAATCCAATAATTCCTC	AATCGGGTAAGGAAATCCAATAATTCCTA	TGGCAGTCAGCGCAGATCA	ACATACCAGTAGAAATCATCAAATTGTCA
25	P361	21431434	GTA0246666	T	C	TGTGATTGGTCTCCAACTTTCTAACA	GTGATTGGTCTCCAACTTTCTAACG	ACCTGTTTCTATGACACAAGGCCT	GCAAGTAGCTTTCCATCATTGTTC
25	P363	21468711	GTA0246648	C	G	GTCTTTTAGACTGTGAGTCAAAGGAAC	TGTCTTTTAGACTGTGAGTCAAAGGAAG	CGAGCCTTGAGTCATGAATATGTCTCT	AGATACAGCTATGCAGCAAGATTTG
25	P372	21469214	GTA0246698	T	G	CACACATCTTTGGGATTAATTGGAACAA	ACACATCTTTGGGATTAATTGGAACAC	CACTGATGTTGGGCAATTAGGCA	GCCCTGACCTTAACCCCAT
25	P222	21530601	GTA0162559	C	A	CGGACAGGACCTGAGGC	TCGGACAGGACCTGAGGA	TCCTTCATTACAACTGCAGCAT	AAACAGGACAGGGAGGAAGT
25	P453	21535437	GTA0262356	G	A	GACAATGTGCGCCAGATTGG	GACAATGTGCGCCAGATTGA	GGTTTCCACAGGCTCACTTCC	TATCCTCCTCTTAGTTTGATGACAA
25	P458	21955099	GTA0262393	A	T	CCAAAATTCCTGAAATTTCCATCCCTAA	CCAAAATTCCTGAAATTTCCATCCCTAT	TGGCAGTTCTATCTAGTTGGAAAATGCT	CAGTCAAATATTTGGAAGGCCAC
25	P374	22346077	GTA0246700	G	T	ACTCACCTGAGCACACAGG	GACTCACCTGAGCACACAGT	TGGCACTGAAGAAAGGTAGCCA	CCTCTGCTCCATCAGGAGA
25	P369	22363310	GTA0246617	T	G	TGTTTTTCAGCCTCAGGTTAGAGAA	TGTTTTTCAGCCTCAGGTTAGAGAC	CTGTCAGGAGGTGTCATAATAAACTG	GACTTAGCTGATCCCTAAGTCTGA
25	P371	22373578	GTA0246616	C	A	TGCGTGCACACAACAAAGAATC	ATGCGTGCACACAACAAAGAATA	CTGGAGGCATTGGTTGGCA	CCATGCGTGTGGACATGAAC
25	P468	22900574	GTA0262346	C	A	CCTTAAGCCACAACCAGTATTTTCG	ACCTTAAGCCACAACCAGTATTTTCT	CCGTCTTCACCAAATTCTTCTGTTTCC	GCTTAAATGCTTTGCAGTCTTACAC
25	P469	22929112	GTA0262348	A	G	AGCAGACGCCGTATTCATGA	AGCAGACGCCGTATTCATGG	GAGAAGGTACGTCTCGGCCT	CCTCGGGAATAGAATAGTGAGTAACA
25	P470	22954748	GTA0262414	G	T	CCCCGTCGCTCTCCAC	CCCCGTCGCTCTCCAA	GTTGTCGTTAATGTCAGACACTTGGAC	CCGGGACCTGGGCTC
25	P472	23514396	GTA0262363	T	C	TCTGGACATTCATCCTAAACGCA	TCTGGACATTCATCCTAAACGCG	TCGAGCAAAAACATCGCAAAGCA	CCAACTTCCTCCTGGTTCCTT
25	P473	23533980	GTA0262368	C	T	GAGAATCATACCCCTAGACCAACG	GAGAATCATACCCCTAGACCAACA	TTCCTTGTCCTATCATTGCTGACGTAAT	CCTCTCGCACCCAAAGC
25	P476	23741596	GTA0262396	T	C	CGGAAGTGGCTGCGCT	GGAAGTGGCTGCGCC	AGGGAAGCAGGTTCTCAAGGT	CGAGGAATGGAGACCAAGC
25	P481	24385764	GTA0262406	G	A	CCCATTGGTTCGCTGCG	TCCCATTGGTTCGCTGCA	CCGGTGATGTTGCCTTGGA	GGCTCCTCCCGCACTC
25	P482	24459019	GTA0262400	C	A	GGTCACATTTAGTGACTCCTCAGG	GGTCACATTTAGTGACTCCTCAGT	AGACAGCATTGGGGACCAGA	TGATCATGGAGAGGGCCAG
25	P483	25069717	GTA0262395	A	T	GCTCTGAGGGCCAAACACT	GCTCTGAGGGCCAAACACA	CCAAGCGTAGCATCAGCTGG	CTGTGACACGCTCAGTAAGG
25	P485	25580318	GTA0262344	G	T	CTGTTCTCCCAGTCCCGG	CTGTTCTCCCAGTCCCGT	CCCTGCCAAACAGAGCAACA	TTTCTGTCTGTCTCTGCCTCT

## Sheet: Table S4
Chromosome	Gene symbol	Start	End	Strand	Gene description	SNP
Omy08	LOC118965637	81193073	81196197	-	uncharacterized LOC118965637
Omy08	LOC110530754	81196167	81200421	+	uncharacterized LOC110530754
Omy08	LOC110531011	81202427	81333398	-	zinc finger E-box-binding homeobox 1
Omy08	LOC118965638	81356959	81365769	+	uncharacterized protein in mobD 3'region-like
Omy08	LOC110530755	81418372	81441728	+	NACHT, LRR and PYD domains-containing protein 1 homolog
Omy08	LOC110531012	81448735	81556398	-	supervillin
Omy08	LOC110531013	81566533	81596921	-	junctional protein associated with coronary artery disease homolog
Omy08	LOC110530762	81618193	81620701	-	eukaryotic translation initiation factor 3 subunit F
Omy08	LOC110530757	81621134	81632686	+	G protein-activated inward rectifier potassium channel 3
Omy08	dnaaf6	81633385	81636491	+	dynein axonemal assembly factor 6
Omy08	LOC110530761	81636669	81665274	+	type I phosphatidylinositol 4,5-bisphosphate 4-phosphatase-A
Omy08	lig1	81666646	81692412	+	DNA ligase 1
Omy08	mpz	81711167	81743458	+	myelin protein zero
Omy08	atp1a2a	81746800	81779970	+	ATPase Na+/K+ transporting subunit alpha 2a
Omy08	sdhc	81783282	81802285	+	succinate dehydrogenase complex, subunit C, integral membrane protein
Omy08	LOC110511052	81808453	81922125	+	cell adhesion molecule 3
Omy08	kirrel1b	81946192	82034520	+	kirre like nephrin family adhesion molecule 1b
Omy08	LOC110530756	82036039	82065385	-	NACHT, LRR and PYD domains-containing protein 1 homolog	P329, P330, P332
Omy08	LOC110530758	82119104	82126352	-	natural killer cell receptor 2B4	P341
Omy08	LOC118965563	82149097	82169688	-	uncharacterized LOC118965563
Omy08	LOC110530759	82213514	82220364	-	SLAM family member 9	P342
Omy08	LOC110530764	82237716	82252379	+	SLAM family member 5	P345, P346, P347
Omy08	LOC118936326	82275115	82284343	-	uncharacterized LOC118936326
Omy08	LOC110530769	82313294	82320766	+	purine nucleoside phosphorylase
Omy08	LOC110531017	82323440	82327007	-	zinc finger protein 260
Omy08	LOC118965565	82332423	82338107	-	oocyte zinc finger protein XlCOF8.4-like
Omy08	uck2b	82341217	82358286	+	uridine-cytidine kinase 2b
Omy08	czib	82359203	82361901	+	CXXC motif containing zinc binding protein
Omy08	scp2a	82362119	82384858	+	sterol carrier protein 2a
Omy08	slc1a7a	82394385	82466886	-	solute carrier family 1 member 7a
Omy08	LOC110530773	82525950	82535140	+	protein shisa-like-2A
Omy08	nadkb	82544272	82566287	-	NAD kinase b
Omy08	LOC110530777	82571210	82613922	-	ski-like protein
Omy08	LOC110531020	82627309	82669746	-	protein kinase C iota type
Omy08	LOC110530778	82664195	82665021	+	eukaryotic translation initiation factor 5A-1
Omy08	LOC110531021	82677481	82692308	-	serine/arginine repetitive matrix protein 2
Omy08	LOC110530779	82705603	82716285	-	death-associated protein kinase 3
Omy08	lsm7	82716461	82721253	-	LSM7 homolog
Omy08	LOC110530781	82728482	82758005	+	signal peptide peptidase-like 2B
Omy08	LOC110530782	82761989	82814035	-	rho guanine nucleotide exchange factor 18
Omy25	LOC110504799	23719242	23746499	-	receptor expression-enhancing protein 2
Omy25	LOC110504800	23751158	23771827	-	lysine-specific demethylase 3B
Omy25	LOC110504801	23776110	23797269	-	spondin-2
Omy25	LOC118946072	23797170	23798667	-	proline-rich protein 36-like
Omy25	LOC110504407	23804000	23826846	-	C-terminal-binding protein 2
Omy25	LOC110504802	23827356	23836857	-	protein FAM53C
Omy25	LOC110504804	23844402	23848266	-	heterogeneous nuclear ribonucleoprotein A/B
Omy25	nme5	23852494	23855249	-	NME/NM23 family member 5
Omy25	rack1	23855594	23859495	-	receptor for activated C kinase 1
Omy25	LOC110504808	23860333	24097749	-	collagen alpha-1(XXIII) chain
Omy25	clk4a	24108935	24127138	-	CDC-like kinase 4a
Omy25	LOC110504812	24140081	24179043	-	ras-GEF domain-containing family member 1C
Omy25	LOC110504813	24264136	24302453	-	glutamine--fructose-6-phosphate aminotransferase [isomerizing] 2
Omy25	LOC110504814	24334697	24357789	-	putative monooxygenase p33MONOX
Omy25	LOC110504815	24387619	24637994	-	A disintegrin and metalloproteinase with thrombospondin motifs 2
Omy25	LOC110504819	24800871	24815921	-	CCR4-NOT transcription complex subunit 6
Omy25	simc1	24816266	24822344	-	SUMO interacting motifs containing 1
Omy25	LOC110504821	24853033	24856333	+	alpha-2Db adrenergic receptor-like
Omy25	slc34a1a	24955847	24981475	-	solute carrier family 34 member 1a
Omy25	LOC100136252	24986094	25003225	-	regulator of G-protein signalling 14
Omy25	LOC110504822	25004273	25011653	+	uncharacterized LOC110504822
Omy25	LOC110504823	25065488	25080226	+	myozenin-2
Omy25	LOC110504824	25080452	25091589	-	uncharacterized LOC110504824
Omy25	LOC110504826	25091632	25181408	+	bifunctional heparan sulfate N-deacetylase/N-sulfotransferase 1
Omy25	LOC100136157	25183222	25191478	+	invariant chain INVX	P446
Omy25	LOC110504829	25199203	25201978	-	SLC35A4 upstream open reading frame protein
Omy25	hmgxb3	25202079	25215380	+	HMG box domain containing 3
Omy25	LOC110504828	25215624	25244116	-	macrophage colony-stimulating factor 1 receptor 1
Omy25	LOC110504831	25244860	25283206	-	platelet-derived growth factor receptor beta
Omy25	LOC110504297	25304278	25308642	+	homeobox protein CDX-1-like
